# Supplementary material
Source: Springer Nature journal article supplement (https://www.springermedizin.de/resource/supplementary/12882_2013_807_MOESM5_ESM.pdf/9454338)

A

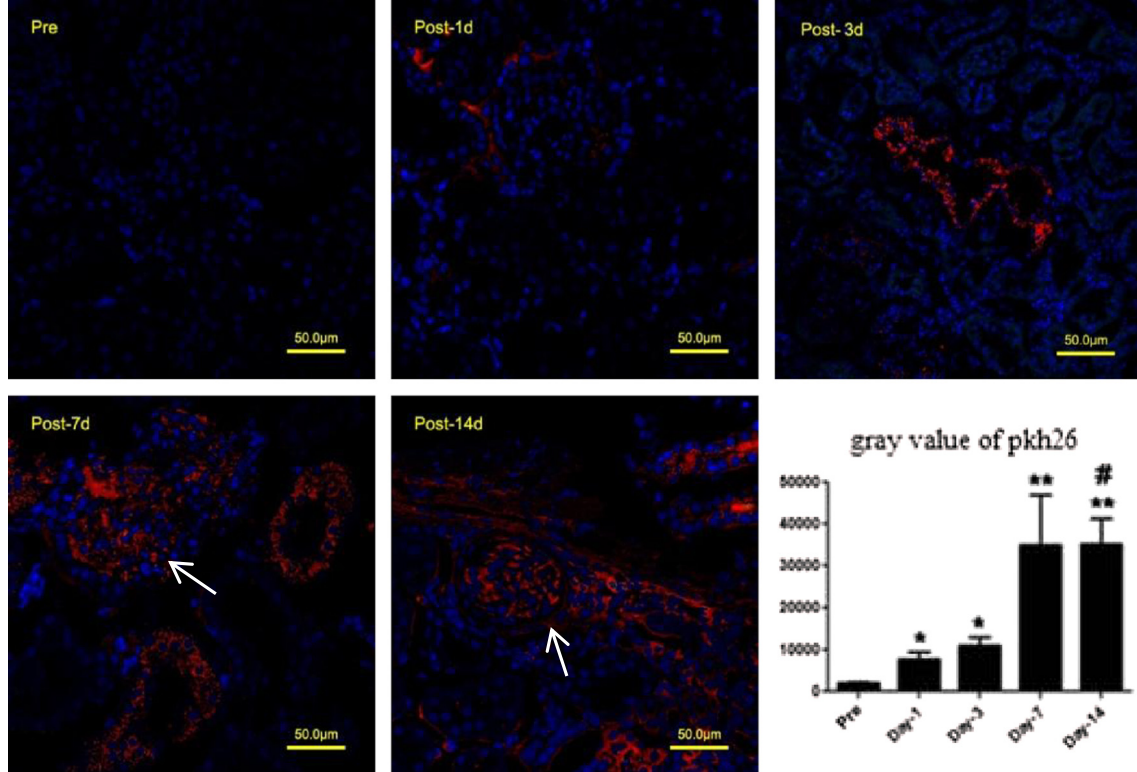

B

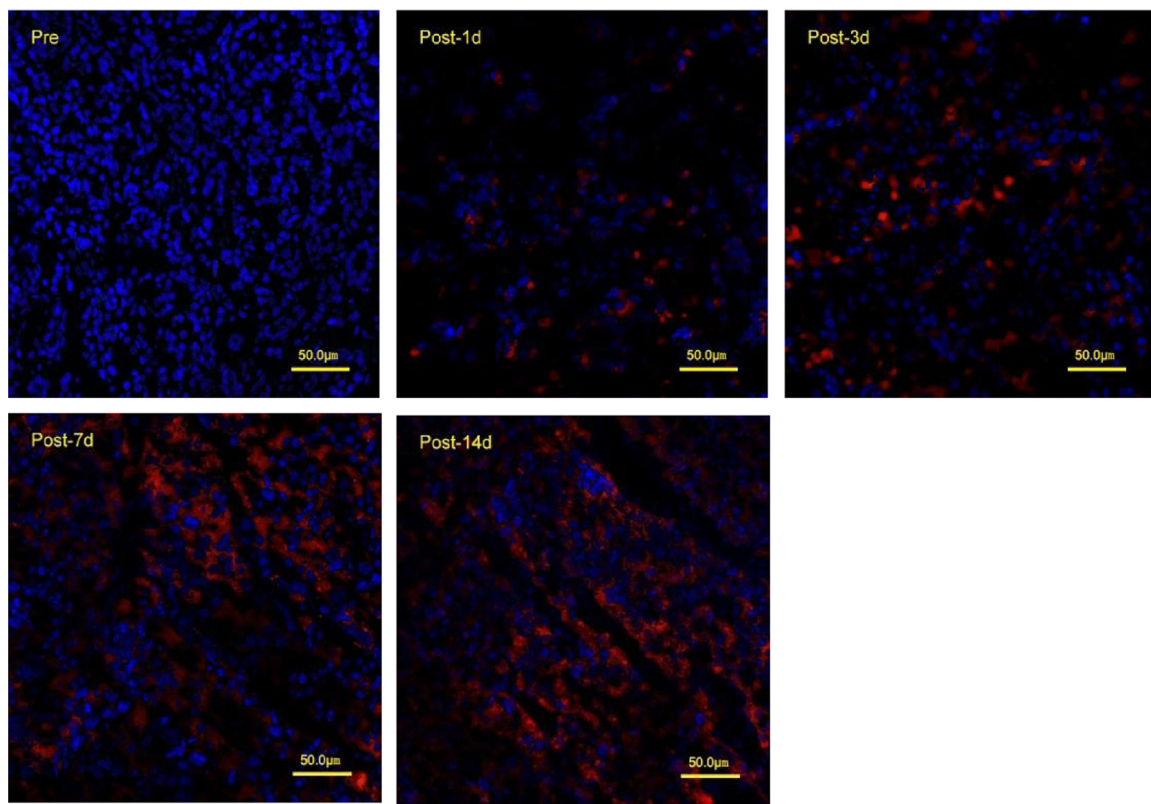

Supplement: MOESM5 [file 9454338]
